# Supplementary material for: Depletion of primary cilia from mature dentate granule cells impairs hippocampus-dependent contextual memory
Source: PubMed Central journal article supplement (PMC5039642; doi:10.1038/srep34370), 2016-09-28
Supplement: srep34370-s1.pdf [file srep34370-s1.pdf]

## **Depletion of primary cilia from mature dentate granule cells impairs hippocampus-dependent contextual memory**

**Soyoung Rhee<sup>1\*</sup>, Gregory W. Kirschen<sup>1,2\*</sup>, Yan Gu<sup>3, 4</sup>, Shaoyu Ge<sup>4#</sup>**

<sup>1</sup>Program in Molecular and Cellular Pharmacology. State University of New York at Stony Brook, Stony Brook, New York, USA. <sup>2</sup>Medical Scientist Training Program. State University of New York at Stony Brook, Stony Brook, New York, USA. <sup>3</sup>Center of Stem Cell and Regenerative Medicine, Zhejiang University School of Medicine, Hangzhou, China. <sup>4</sup>Department of Neurobiology and Behavior, State University of New York at Stony Brook, Stony Brook, New York, USA.

\* These authors contributed equally to the work.

#Correspondence should be addressed to Shaoyu Ge (shaoyu.ge@stonybrook.edu)

**Supplementary Figure 1. Specificity of AAV-CaMKII-driving expression in the dentate gyrus**

**(a)** Representative image of AAV-CAG-eGFP showing co-localization of GFP and parvalbumin (PV).

**(b)** Representative image of AAV-CaMKII-eGFP showing lack of co-localization between GFP and PV.

Scale bars: 30 $\mu$ m.

**Supplementary Figure 2. Adult neurogenesis was not significantly affected by removal of primary cilia**

**(a)** The averaged number of DCX positive cells was not significantly different between CTRL and IFT20(-/-)<sup>mDGCs</sup> (30.28 $\pm$ 1.91 for CTRL and 30.51 $\pm$ 2.34 for IFT20(-/-)<sup>mDGCs</sup>; two-tailed unpaired t-test p=0.94, n=6,6). n is the number of animals; Field size: 320 $\mu$ m  $\times$  320 $\mu$ m  $\times$  36 $\mu$ m.

**(b)** Dendritic complexity of DCX+ cells did not differ significantly between CTRL and IFT20(-/-)<sup>mDGCs</sup> mice (repeated measures ANOVA main effect of condition F(1,17) = 1.512; p = 0.236; n=3,3)

n is the number of animals.

**Supplementary Figure 3. Ablation of primary cilia from mature dentate granule cells does not alter pattern encoding**

**(a)** Pattern encoding task paradigm.

**(b-c)** Both control mice and IFT20(-/-)<sup>mDGCs</sup> mice learned to discriminate between a a

shock-associated environment (A) and safe environment (B). CTRL: Repeated measures ANOVA main effect of environment:  $F(1,17) = 5.935$ ;  $p = 0.026$ ; interaction between environment and day:  $F(7,11) = 36.163$ ;  $p < 0.0001$ ;  $n = 13$ . IFT20(-/-)<sup>mDGCs</sup>: Repeated measures ANOVA main effect of environment:  $F(1,15) = 6.568$ ;  $p = 0.022$ ; interaction between environment and day:  $F(7,9) = 47.140$ ;  $p < 0.0001$ ;  $n = 11$ .

**(d)** Average discrimination ratios (DRs) between safe and shock-associated environments did not differ significantly between groups (Repeated measures ANOVA main effect of group:  $F(1,15) = 1.161$ ;  $p = 0.298$ ; interaction between group and day:  $F(7,9) = 2.559$ ;  $p = 0.095$ ;  $n = 18,16$ ).

\* $p < 0.05$ ;  $n$  is the number of animals.

#### **Supplementary Figure 4. Ablation of primary cilia from mature dentate granule cells affects spatial novelty recognition memory**

**(a)** Spatial novelty recognition test paradigm.

**(b)** CTRL mice spent significantly more time exploring a novel object location versus a familiar location, however IFT20(-/-)<sup>mDGCs</sup> mice did not spend a significantly different amount of time exploring either of the object locations (CTRL: old location  $21.0 \pm 2.4$  sec; new location  $28.4 \pm 2.5$  sec; two-tailed unpaired t-test  $p = 0.044$ ; IFT20(-/-)<sup>mDGCs</sup>: old location  $27.2 \pm 3.4$  sec; new location  $26.6 \pm 2.5$  sec; two-tailed unpaired t-test  $p = 0.895$ ;  $n = 11,11$ ).

**(c)** CTRL mice exhibited a trend toward more entries into a novel object location versus a familiar location, however IFT20(-/-)<sup>mDGCs</sup> mice did not (CTRL: old location  $162.0 \pm 19.7$  entries; new location  $214.6 \pm 24.7$  entries; two-tailed unpaired t-test  $p = 0.111$ ; IFT20(-/-)<sup>mDGCs</sup>: old location  $200.0 \pm 28.9$  entries; new location  $196.8 \pm 21.0$  sec; two-tailed unpaired t-

test  $p = 0.930$ ;  $n=11,11$ ).

$n$  is the number of animals.

**Supplementary Figure 5. Ablation of primary cilia from mature dentate granule cells does not alter anxiety-like behavior on the elevated plus maze**

Average time spent at center, open and closed arms during the experiment. No significant difference between CTRL and IFT20(-/-)<sup>mDGCs</sup> mice ( $24.80 \pm 5.14\%$  for CTRL and  $32.87 \pm 5.86\%$  for IFT20(-/-)<sup>mDGCs</sup> mice at the open arm; two-tailed unpaired t-test  $p=0.31$ ;  $n=18,20$ ).

$n$  is the number of animals.

**Supplementary Figure 6. Ablation of primary cilia from mature dentate granule cells does not alter anxiety-like behavior on the light/dark transition test**

Average time spent in light and dark compartment during 10 minutes. The time spent in dark compartment differ significantly between CTRL and IFT20(-/-)<sup>mDGCs</sup> mice ( $80.48 \pm 2.39\%$  for CTRL and  $78.40 \pm 1.88$  for IFT20(-/-)<sup>mDGCs</sup>; two-tailed unpaired t-test  $p=0.50$ ;  $n=18,20$ ;  $n$  is the number of animals).

**Supplementary Figure 7. I-O curve for CTRL and IFT20(-/-)<sup>mDGCs</sup>**

Input and output curve obtained from CTRL and IFT20(-/-)<sup>mDGCs</sup> mice. Synaptic transmission was not altered in IFT20(-/-)<sup>mDGCs</sup> from 10 to 35mA of stimulation intensity ( $n=5,6$ ;  $n$  is the number of brain slices).



a.

AAV-CAG-eGFP

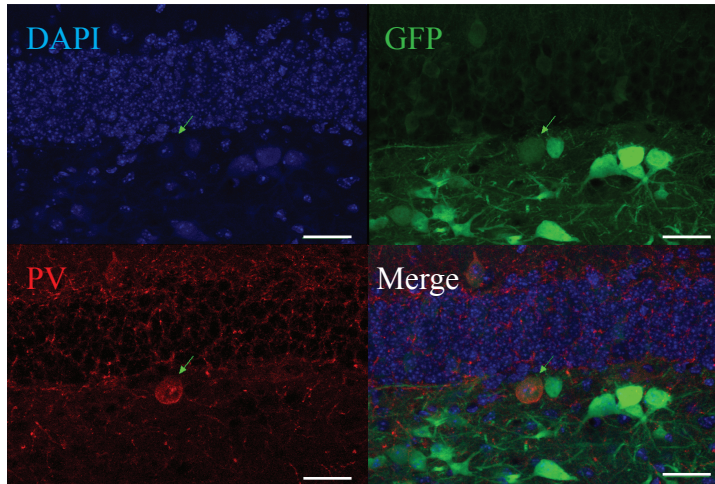

b.

AAV-CaMKII-eGFP

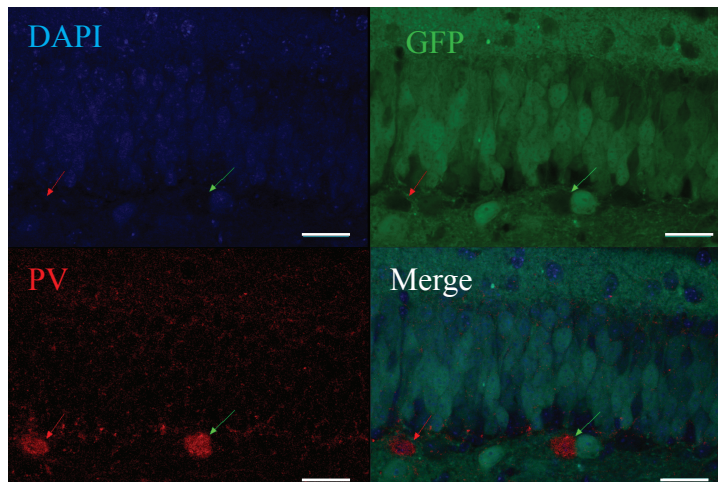

Supplementary Figure 1. Specificity of AAV-CaMKII-driving expression in the dentate gyrus

a.

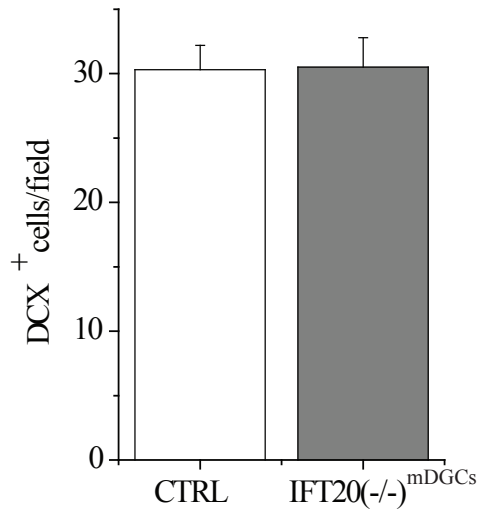

b.

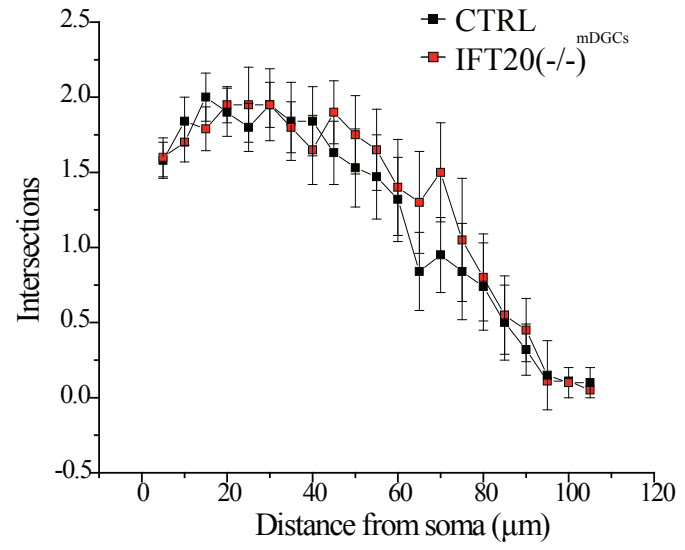

**Supplementary Figure 2. Adult neurogenesis was not significantly affected by removal of primary cilia**

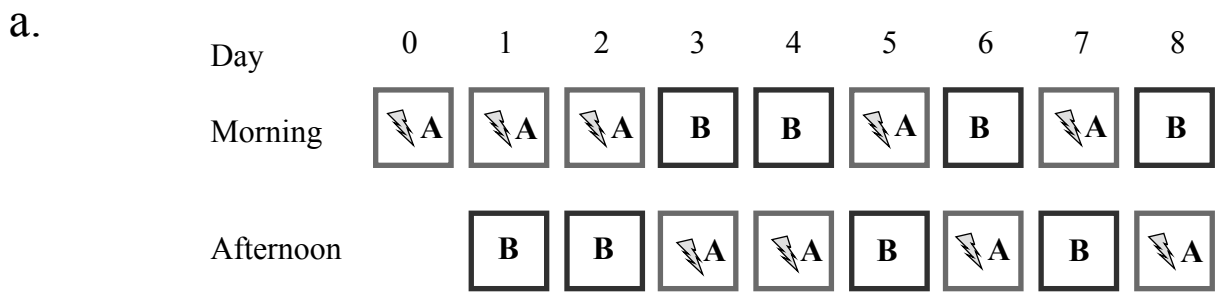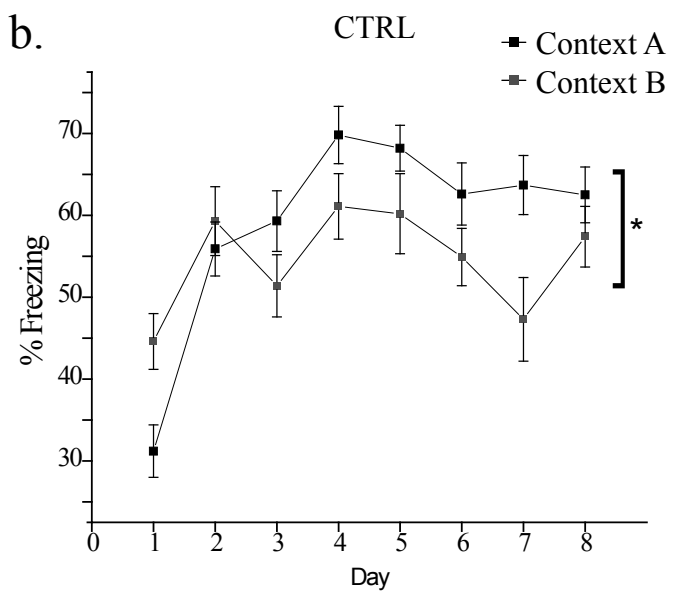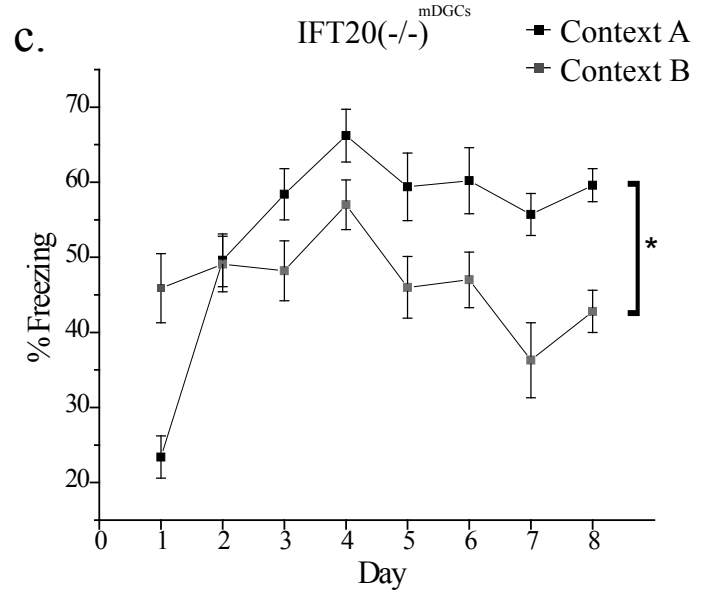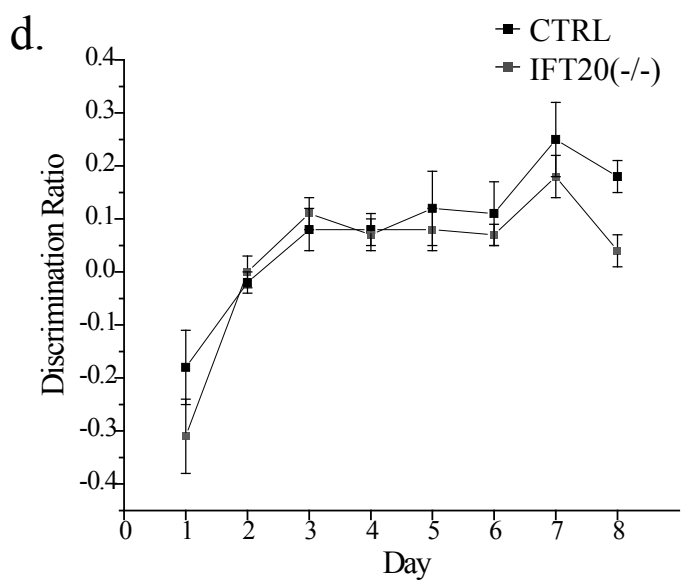

**Supplementary Figure 3. Ablation of primary cilia from mature dentate granule cells does not alter pattern encoding**

a.

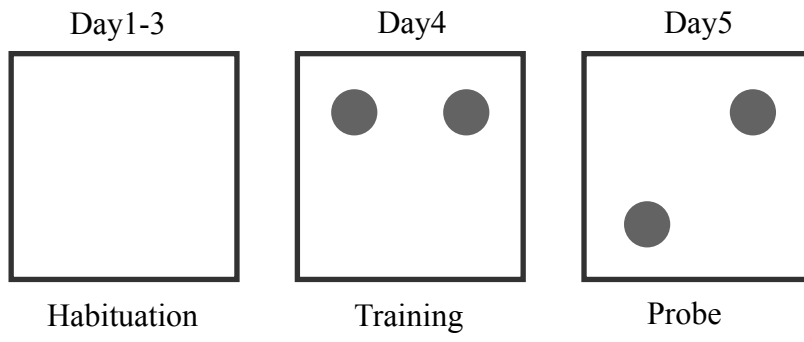

b.

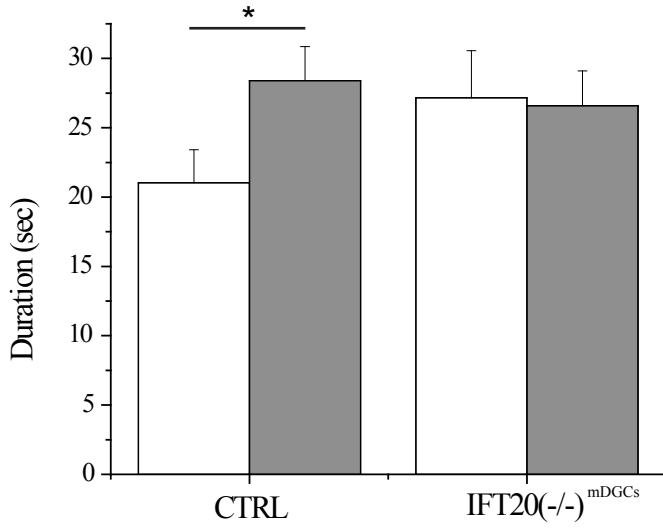

c.

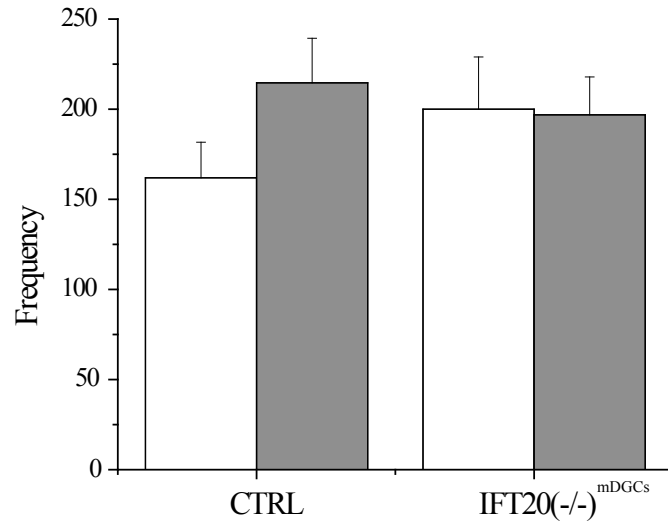

**Supplementary Figure 4. Ablation of primary cilia from mature dentate granule cells affects spatial novelty recognition memory**

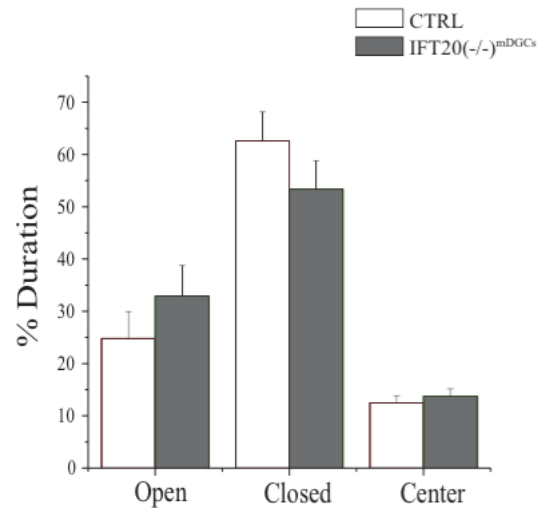

**Supplementary Figure 5. Ablation of primary cilia from mature dentate granule cells does not alter anxiety-like behavior on the elevated plus maze**

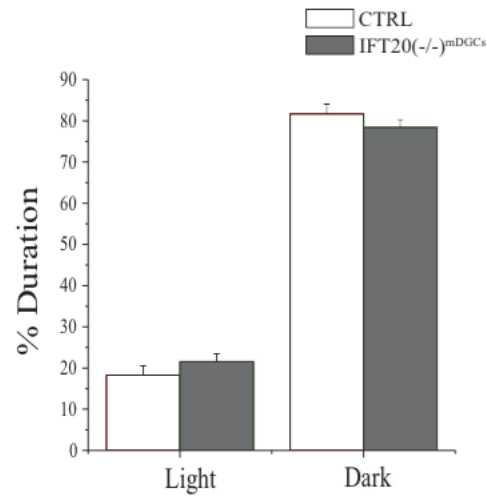

**Supplementary Figure 6. Ablation of primary cilia from mature dentate granule cells does not alter anxiety-like behavior on the light/dark transition test**

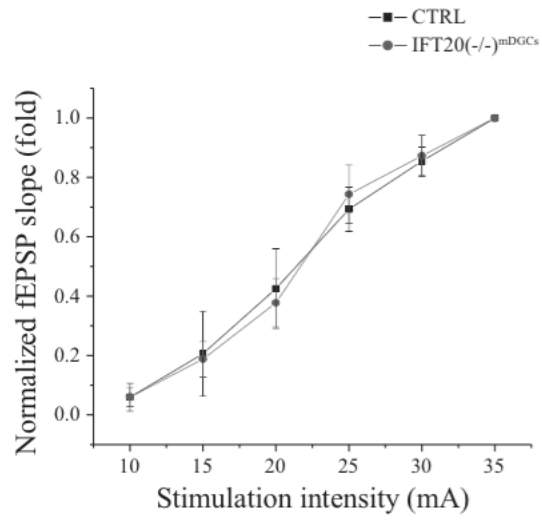

**Supplementary Figure 7. I-O curve for CTRL and IFT20(-/-) mDGCs**
